# Supplementary material for: Peripheral kynurenine/tryptophan ratio is not a reliable marker of systemic indoleamine 2,3-dioxygenase: A lesson drawn from patients on hemodialysis
Source: PubMed Central journal article supplement (PMC5421927; doi:10.18632/oncotarget.15705), 2017-02-25
Supplement: oncotarget-08-25261-s001.pdf [file oncotarget-08-25261-s001.pdf]

## Peripheral kynurenine/tryptophan ratio is not a reliable marker of systemic indoleamine 2,3-dioxygenase: A lesson drawn from patients on hemodialysis

### SUPPLEMENTARY MATERIALS

### SUPPLEMENTARY FIGURES AND TABLE

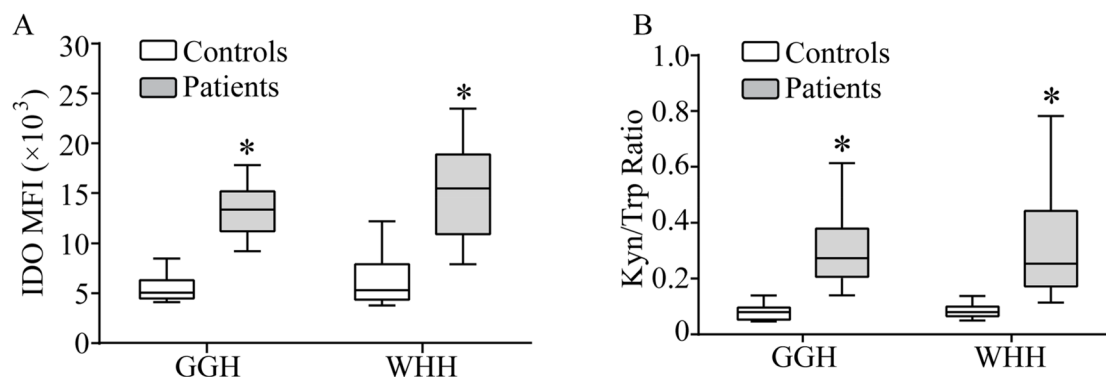

**Supplementary Figure 1: Differences in IDO markers between the controls and the matched hemodialysis patients.** The controls (n=10) and the patients (n=20) were matched 1:2 based on gender and age (difference <5 years). **(A)** The IDO MFI of the patients was significantly higher than that of the controls. **(B)** The Kyn/Trp ratio of the patients was significantly higher than that of the controls. \*P<0.05 vs. the controls. GGH, Guangdong General Hospital; WHH, Wuhua People's Hospital; MFI: median fluorescence index.

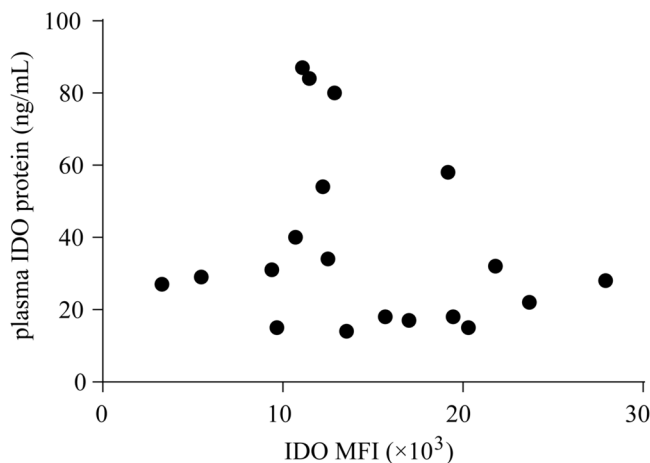

**Supplementary Figure 2: Association between plasma IDO level and the IDO MFI.** Methods: Whole peripheral blood samples were collected from 15 hemodialysis patients and 5 healthy controls. After centrifugation, PBMCs were isolated by Ficoll-Paque density centrifugation (GE Healthcare, Uppsala, Sweden), and the IDO MFI was detected. IDO protein level was detected using an anti-human IDO1 enzyme-linked immunosorbent assay (USCN Life Science, Wuhan, China). Results: Plasma IDO protein levels and the IDO MFI in PBMCs did not show a correlation ( $r_s = 0.255$ ,  $P=0.277$ ). MFI: median fluorescence index; PBMCs: peripheral blood mononuclear cells.

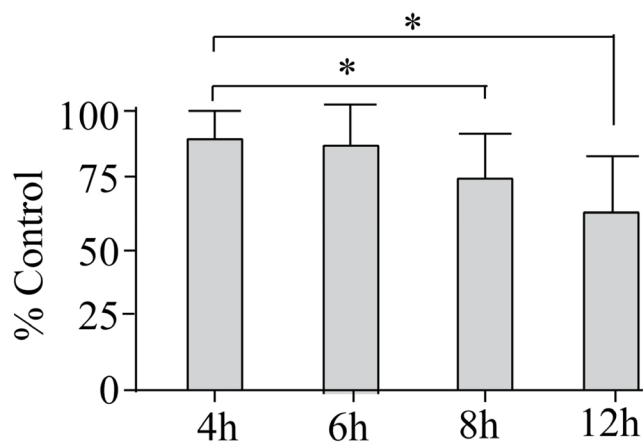

**Supplementary Figure 3: Energy metabolism of PBMCs incubated with Tyr.** Data were obtained using the MTT test. Method: Fresh PBMCs were washed twice, resuspended in Hanks buffer containing 100  $\mu$ M tryptophan (Sigma–Aldrich, St Louis, MO, USA), and incubated for 4 h, 6 h, 8 h and 12 h. Cell energy metabolism was detected using an MTT assay kit (Nanjing KeyGen Biotech. Co. Ltd., China) according to the manufacturer’s instructions. Results: After 8 and 12 h of *in vitro* co-incubation in buffer without serum and culture media, the metabolism of the PBMCs was noticeably decreased. A repeated-measures analysis was performed to assess the differences between the different time points: \* $P < 0.05$ , results of the MTT test vs. those obtained at 4 h (control).

**Supplementary Table 1: Clinical characteristics of hemodialysis patients in the two participating hospitals**

| Characteristics                        | GGH (n=182)       | WHH (n=46)        |
|----------------------------------------|-------------------|-------------------|
| Age, years                             | 59±15             | 46±11             |
| Male, n (%)                            | 108 (59.3)        | 29 (63.0)         |
| Dialysis vintage, months               | 40 (20,61)        | 36 (24, 59)       |
| Diabetes, n (%)                        | 43 (23.6)         | 5 (10.9)          |
| Kt/V                                   | 1.60 (1.38, 1.80) | 1.11 (0.98, 1.39) |
| Albumin, g/dL                          | 3.19±0.31         | 3.60±0.34         |
| iPTH, pg/mL                            | 204 (103, 408)    | 351 (153, 768)    |
| Ca×P, mg <sup>2</sup> /dL <sup>2</sup> | 54.8 (44.0, 66.0) | 73.9 (59.5, 90.0) |
| C-reactive protein, mg/L               | 3.1 (1.8, 6.6)    | 5.0 (3.0, 8.5)    |
| Cholesterol, mmol/L                    | 4.0 (3.3, 4.9)    | 5.0 (3.0, 9.3)    |
| GNRI                                   | 89.4±7.1          | 96.3±9.5          |

GGH is the Professional Blood Purification Quality Administration and Control Center of Guangdong Province and represents an urban academic hospital in developed areas of China. WHH is a county hospital in an under-developed agricultural area of Guangdong Province. GGH: Guangdong General Hospital; WHH: Wuhua People's Hospital; iPTH: intact parathyroid hormone; Ca×P: product of calcium and phosphorus; GNRI: Geriatric Nutritional Risk Index.
